# Supplementary material for: Identifying Information Needs for Hirschsprung Disease Through Caregiver Involvement via Social Media: A Prioritization Study and Literature Review
Source: PubMed Central journal article supplement (PMC6320415; doi:10.2196/jmir.9701), 2018-12-21

## Multimedia Appendix 2. Pediatric Surgeon Survey (Prefaced with Survey Consent Disclosure)

| <b>Part 1 – Survey 1</b>                                                                                                 |                                                                                                                                                                                                                                                                                                                                                                                                                                                                                                                                                                                                                                                                                                                                                                                                                                                                                                                                                                                                                                                                                                                                                      |
|--------------------------------------------------------------------------------------------------------------------------|------------------------------------------------------------------------------------------------------------------------------------------------------------------------------------------------------------------------------------------------------------------------------------------------------------------------------------------------------------------------------------------------------------------------------------------------------------------------------------------------------------------------------------------------------------------------------------------------------------------------------------------------------------------------------------------------------------------------------------------------------------------------------------------------------------------------------------------------------------------------------------------------------------------------------------------------------------------------------------------------------------------------------------------------------------------------------------------------------------------------------------------------------|
| What are the most common problems (top 5) related to Hirschsprung's Disease that you encounter in your practice?         | [open ended]<br>1.<br>2.<br>3.<br>4.<br>5.                                                                                                                                                                                                                                                                                                                                                                                                                                                                                                                                                                                                                                                                                                                                                                                                                                                                                                                                                                                                                                                                                                           |
| How long have you been in practice with patients who have Hirschsprung's Disease?                                        | 0-5 years<br>6-15 years<br>>15 years                                                                                                                                                                                                                                                                                                                                                                                                                                                                                                                                                                                                                                                                                                                                                                                                                                                                                                                                                                                                                                                                                                                 |
| How many patients with Hirschsprung's Disease do you see every year?                                                     | 0-5 cases<br>>5 cases                                                                                                                                                                                                                                                                                                                                                                                                                                                                                                                                                                                                                                                                                                                                                                                                                                                                                                                                                                                                                                                                                                                                |
| Do you have multidisciplinary follow up for Hirschsprung's Disease patients in your practice?                            | Yes<br>No                                                                                                                                                                                                                                                                                                                                                                                                                                                                                                                                                                                                                                                                                                                                                                                                                                                                                                                                                                                                                                                                                                                                            |
| <b>Part 2 – Survey 2</b>                                                                                                 |                                                                                                                                                                                                                                                                                                                                                                                                                                                                                                                                                                                                                                                                                                                                                                                                                                                                                                                                                                                                                                                                                                                                                      |
| What resources do you use to guide your medical management of HD?<br><i>Check all that apply.</i>                        | Point of Care Tools (i.e. UpToDate, MD-consult)<br><br>Practice Guidelines or Protocol<br><br>Your Expert Opinion (knowledge & experience)<br><br>Expert Opinion from a Colleague<br><br>Journal Articles in fields related to HD:<br><ul style="list-style-type: none"> <li><input type="checkbox"/> Systematic reviews / meta-analyses</li> <li><input type="checkbox"/> Narrative reviews</li> <li><input type="checkbox"/> Clinical trials</li> <li><input type="checkbox"/> Cohort studies</li> <li><input type="checkbox"/> Case studies</li> <li><input type="checkbox"/> Editorial / opinion papers</li> <li><input type="checkbox"/> Any study type</li> </ul><br>Journal Articles about HD:<br><ul style="list-style-type: none"> <li><input type="checkbox"/> Systematic reviews / meta-analyses</li> <li><input type="checkbox"/> Narrative reviews</li> <li><input type="checkbox"/> Clinical trials</li> <li><input type="checkbox"/> Cohort studies</li> <li><input type="checkbox"/> Case studies</li> <li><input type="checkbox"/> Editorial / opinion papers</li> <li><input type="checkbox"/> Any study type</li> </ul><br>Other: |
| Do you have practice guidelines, tools or pathways that your facility uses for managing HD that you could share with us? | Yes<br>No<br><b>If yes</b> , please send via email to our study team at [email provided].                                                                                                                                                                                                                                                                                                                                                                                                                                                                                                                                                                                                                                                                                                                                                                                                                                                                                                                                                                                                                                                            |
| May we contact you for further information on guidelines, tools, or pathways?                                            | Yes<br>No<br><b>If so</b> , please provide your preferred contact information.<br>Contact information:                                                                                                                                                                                                                                                                                                                                                                                                                                                                                                                                                                                                                                                                                                                                                                                                                                                                                                                                                                                                                                               |

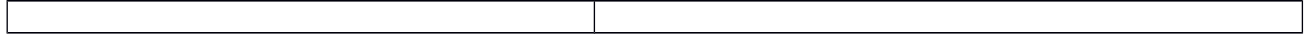

Supplement: jmir_v20i12e297_app2.pdf [file jmir_v20i12e297_app2.pdf]
