# Supplementary material for: Identifying Information Needs for Hirschsprung Disease Through Caregiver Involvement via Social Media: A Prioritization Study and Literature Review
Source: PubMed Central journal article supplement (PMC6320415; doi:10.2196/jmir.9701), 2018-12-21
Supplement: jmir_v20i12e297_app1.pdf [file jmir_v20i12e297_app1.pdf]

## Multimedia Appendix 1. Caregiver Survey (Prefaced with Survey Consent Disclosure)

| <b>Part 1 – Demographics</b>                                                                                                                                                                 |                                                                                                                                                                                                                                                                                                                                                                                                                                                                                                                                                                                    |
|----------------------------------------------------------------------------------------------------------------------------------------------------------------------------------------------|------------------------------------------------------------------------------------------------------------------------------------------------------------------------------------------------------------------------------------------------------------------------------------------------------------------------------------------------------------------------------------------------------------------------------------------------------------------------------------------------------------------------------------------------------------------------------------|
| What range does the year of birth of your child fall in?                                                                                                                                     | 2012-2014<br>2009-2011<br>2006-2008<br>1995-2005<br>Before 1995                                                                                                                                                                                                                                                                                                                                                                                                                                                                                                                    |
| What type of Hirschsprung's Disease (HD) does your child have?                                                                                                                               | Ultra Short Disease<br>Short Segment Disease (Includes the rectum up to the sigmoid colon)<br>Long Segment Disease (beyond the sigmoid colon)<br>Unsure                                                                                                                                                                                                                                                                                                                                                                                                                            |
| At what age was your child diagnosed with Hirschsprung's Disease?                                                                                                                            | 0-1 month<br>2-12 months<br>13 months- 4 years<br>> 4 years                                                                                                                                                                                                                                                                                                                                                                                                                                                                                                                        |
| What age did your child have their "pull through" surgery?                                                                                                                                   | 0-3 months<br>>3months- 6 months<br>>6 months- 12 months<br>>12 months                                                                                                                                                                                                                                                                                                                                                                                                                                                                                                             |
| Give up to 5 problems that your child has, or has had in the past, related to HD:                                                                                                            | [open ended]<br>1.<br>2.<br>3.<br>4.<br>5.                                                                                                                                                                                                                                                                                                                                                                                                                                                                                                                                         |
| What is your confidence level to successfully manage this problem?                                                                                                                           | Not Confident at all<br>Not Very Confident<br>Somewhat Confident<br>Confident<br>Very Confident                                                                                                                                                                                                                                                                                                                                                                                                                                                                                    |
| <i>*Repeat as above for Problems #2- #5</i>                                                                                                                                                  |                                                                                                                                                                                                                                                                                                                                                                                                                                                                                                                                                                                    |
| How satisfied are you with the current resources provided to you to manage problems that arise with your child's Hirschsprung's Disease? (web-based resources or written material available) | Not Satisfied<br>Not Very Satisfied<br>Somewhat Satisfied<br>Satisfied<br>Very Satisfied                                                                                                                                                                                                                                                                                                                                                                                                                                                                                           |
|                                                                                                                                                                                              | Comments:                                                                                                                                                                                                                                                                                                                                                                                                                                                                                                                                                                          |
| If information was available on how to manage problems related to HD how would you like to obtain this information?                                                                          | Please rank from 1- 5 (1 is the most desired and 5 is the least desired route)<br><br><input type="checkbox"/> Link to a health care site where written guidelines are available (i.e. Winnipeg Children's Hospital home page)<br><input type="checkbox"/> A report from this project (available on the HD social media sites)<br><input type="checkbox"/> In a story where a child and parent encounter and resolve a problem (available on the HD social media sites)<br><input type="checkbox"/> In a video explanation (I.e. Youtube)<br><input type="checkbox"/> Other: _____ |
